# Supplementary material for: Green template-free synthesis of SnO2 nanospheres – a physical understanding and electrochemistry
Source: Royal Society of Chemistry journal article supplement (doi:10.1039/c3ra43060j), 2013-01-01
Supplement: c3ra43060j.pdf [file c3ra43060j.pdf]

Supporting Information for:

***Green Template-free Synthesis of SnO<sub>2</sub> Nano Sphere- A Physical Understanding and Electrochemistry***

*Alok M. Tripathi and Sagar Mitra\**

Electrochemical Energy Laboratory, Department of Energy Science and Engineering, Indian Institute of Technology Bombay, Mumbai, INDIA-400076

- **Fig.S. I. 1.** FEG-TEM image for growth of solid core in hollow SnO<sub>2</sub>nanosphere during different calcination time.
- **Fig. S. I. 2.** Nitrogen adsorption de-sorption curve for B. E. T. Surface area of (a) SnO<sub>2</sub> hollow nanosphere and (b) SnO<sub>2</sub> solid naospheres.
- **Fig. S. I. 3.** Cyclic voltammogram of SnO<sub>2</sub> solid and hollow ball against Li/Li<sup>+</sup> at scan rate of 0.01mV/s in potential window of 0.01-1.2V at 20°C.
- **Fig. S. I. 4.**Charge Discharge curve for SnO<sub>2</sub> hollow sphere against Li/Li<sup>+</sup> in potential window of 0.01V-1.2V.
- **Table S1** Comparative electrochemical behaviour of hollow SnO<sub>2</sub> spheres as anode of Lithium-ion battery

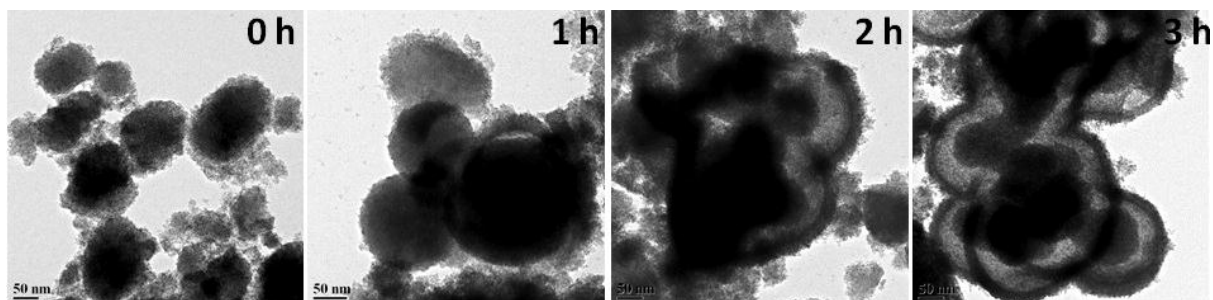

**Fig. S. I. 1.** FEG-TEM image for growth of solid core in hollow SnO<sub>2</sub>nanosphere during different calcination time.

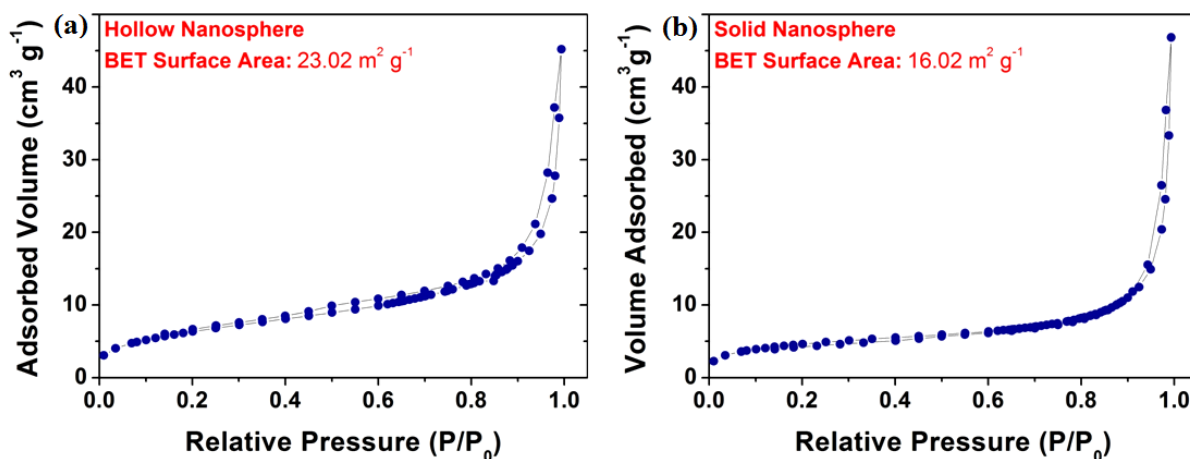

**Figure S. I. 2.** Nitrogen adsorption de-sorption curve for B. E. T. Surface area of (a) SnO<sub>2</sub> hollow nanosphere and (b) SnO<sub>2</sub> solid nanospheres .

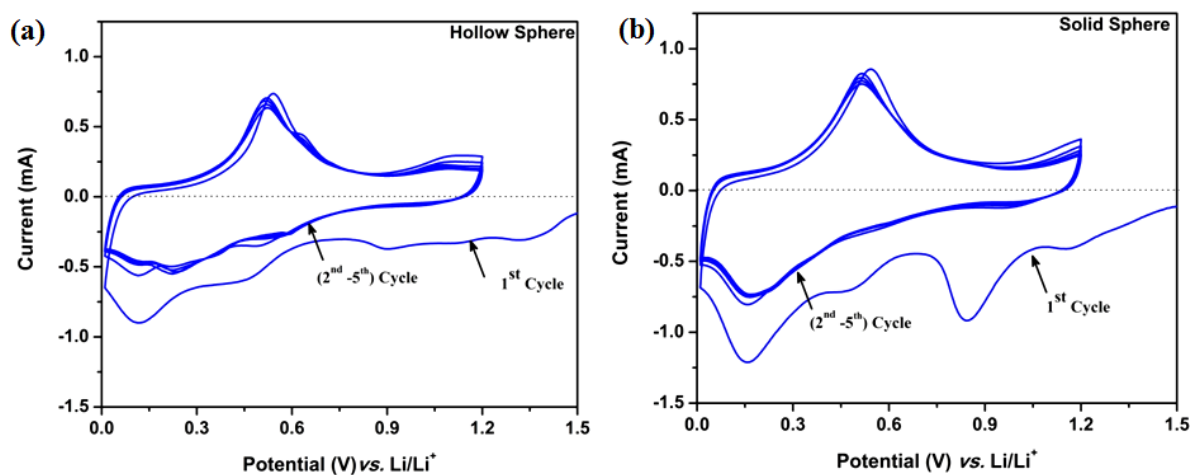

**Fig. S. I. 3.** Cyclic voltammogram of SnO<sub>2</sub> solid and hollow spheres against Li/Li<sup>+</sup> at scan rate of 0.01mV/s in potential window of 0.01-1.2V at 20°C.

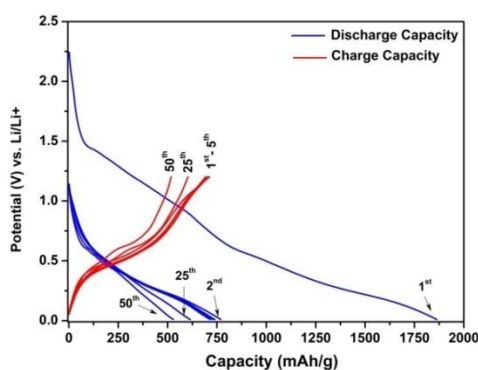

**Fig. S. I. 4.** Charge Discharge curve for SnO<sub>2</sub> hollow sphere against Li/Li<sup>+</sup> in potential window of 0.01V-1.2V.

**Table S1** Comparative electrochemical behaviour of hollow SnO<sub>2</sub> spheres as anode of Lithium-ion battery

| Sr. No. | Size (nm) | Total (%) of Carbon | Current (mA <sup>g</sup> <sup>-1</sup> ) | Capacity (mAh <sup>g</sup> <sup>-1</sup> ) | Number of cycles | Reference  |
|---------|-----------|---------------------|------------------------------------------|--------------------------------------------|------------------|------------|
| 1.      | 100-200   | 20                  | 177.56                                   | 532                                        | 50               | Our result |
| 2.      | 200       | 20                  | 156.4                                    | 593                                        | 50               | 1          |
| 3.      | 600       | 27.4                | 156                                      | 450                                        | 30               | 2          |
| 4.      | 600       | 41.56               | 100                                      | 500                                        | 50               | 3          |
| 5.      | 2000      | 10                  | 100                                      | 250                                        | 50               | 4          |
| 6.      | 300-400   | 35.84               | 625                                      | 460                                        | 50               | 5          |
| 7.      | 110       | 36.8                | 100                                      | 473                                        | 50               | 6          |

## REFERENCES

- (1) Wang, Z.; Wang, Z. C.; Madhavi, S.; Lou, X. W. *Chem. Eur. J.*, **2012**, *18*, 7561 – 7567.
- (2) Chen, X.; Kierzek, K.; Wilgoz, K.; Machnikowski, J.; Chu, P. K.; Mijiowska, E. *J. Power Sources*, **2012**, *216*, 475-481.
- (3) Chen, Y.; Huang, Q. Z.; wang, J.; Xue, J. M. *J. Mater. Chem.*, **2011**, *21*, 17448–17453.
- (4) Liu, J. L.; Li, W.; Manthiram, A. *Chem. Comm.*, **2010**, *46*, 1437–1439.
- (5) Lou, X. W.; Li, C. M.; Archer, L. A. *Adv. Mater.* **2009**, *21*, 2536–2539.
- (6) Lou, X. W.; Deng, D.; Lee, J. Y.; Archer, L.A. *Chem. Mater.* **2008**, *20*, 6562–6566.
